# Supplementary material for: UBAP2L ensures homeostasis of nuclear pore complexes at the intact nuclear envelope
Source: PubMed Central journal article supplement (PMC11040503; doi:10.1083/jcb.202310006), 2024-04-23

Corresponding to Fig. 10B

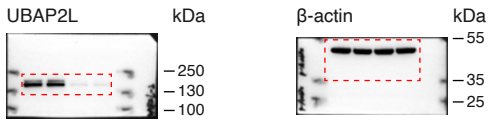

Corresponding to Fig. 10E

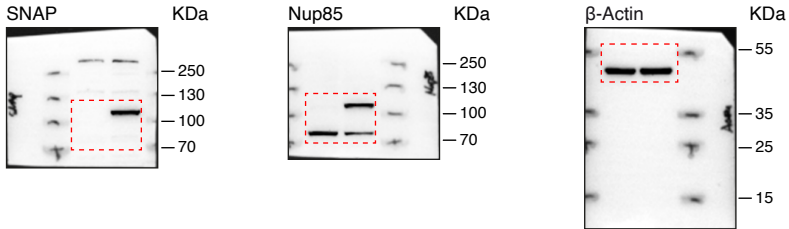

Corresponding to Fig. 10I

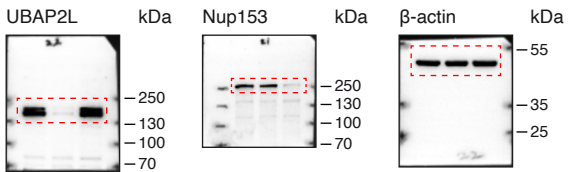

Supplement: JCB_202310006_SourceDataF10.pdf [file JCB_202310006_SourceDataF10.pdf]
