# Supplementary material for: UBAP2L ensures homeostasis of nuclear pore complexes at the intact nuclear envelope
Source: PubMed Central journal article supplement (PMC11040503; doi:10.1083/jcb.202310006), 2024-04-23

Corresponding to Fig. S2D

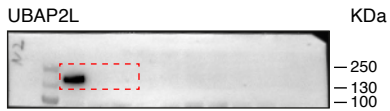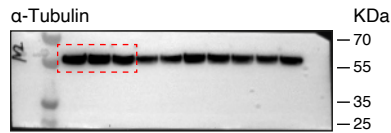

Corresponding to Fig. S2I

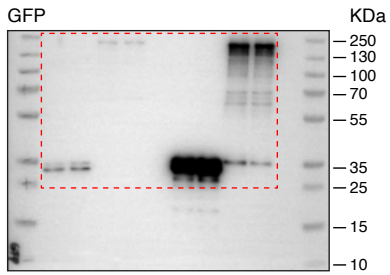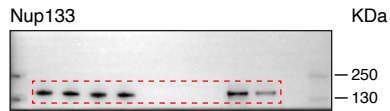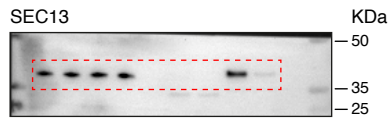

Corresponding to Fig. S2J

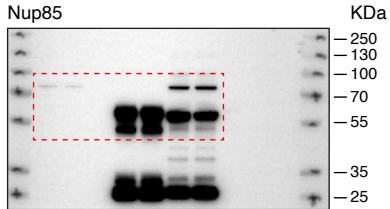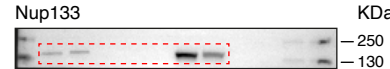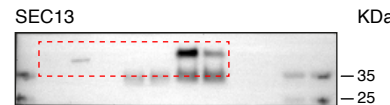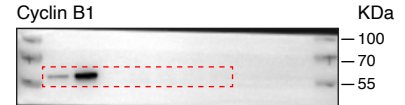

Corresponding to Fig. S2K

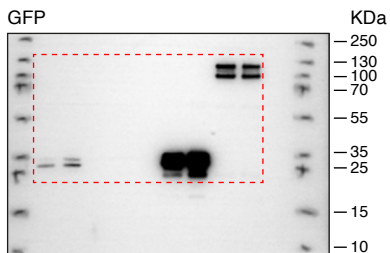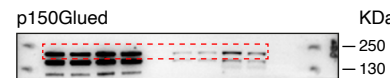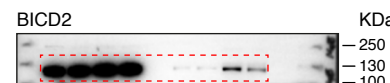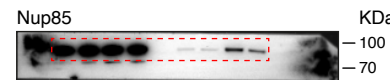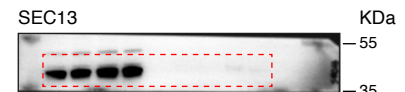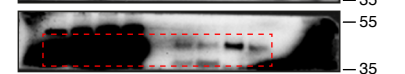

Supplement: JCB_202310006_SourceDataFS2.pdf [file JCB_202310006_SourceDataFS2.pdf]
