# Supplementary material for: UBAP2L ensures homeostasis of nuclear pore complexes at the intact nuclear envelope
Source: PubMed Central journal article supplement (PMC11040503; doi:10.1083/jcb.202310006), 2024-04-23

Corresponding to Fig. S3F

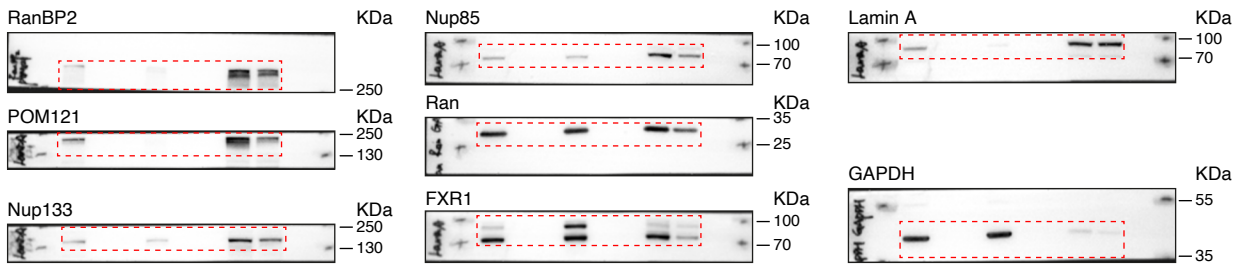

Corresponding to Fig. S3G

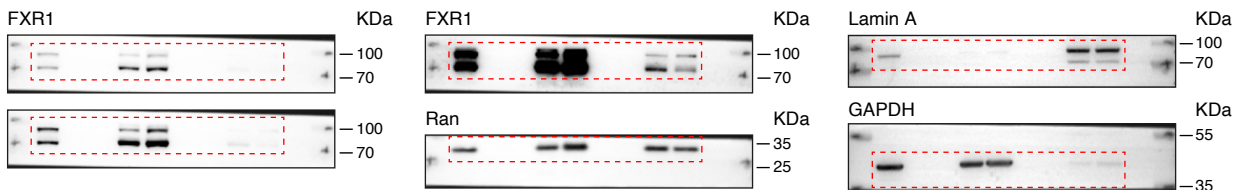

Corresponding to Fig. S3J

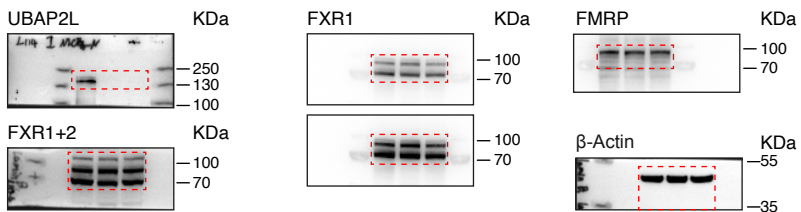

Corresponding to Fig. S3L

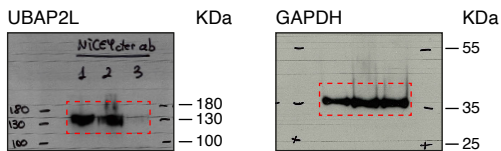

Supplement: JCB_202310006_SourceDataFS3.pdf [file JCB_202310006_SourceDataFS3.pdf]
