# Supplementary material for: UBAP2L ensures homeostasis of nuclear pore complexes at the intact nuclear envelope
Source: PubMed Central journal article supplement (PMC11040503; doi:10.1083/jcb.202310006), 2024-04-23

Corresponding to Fig. S5J

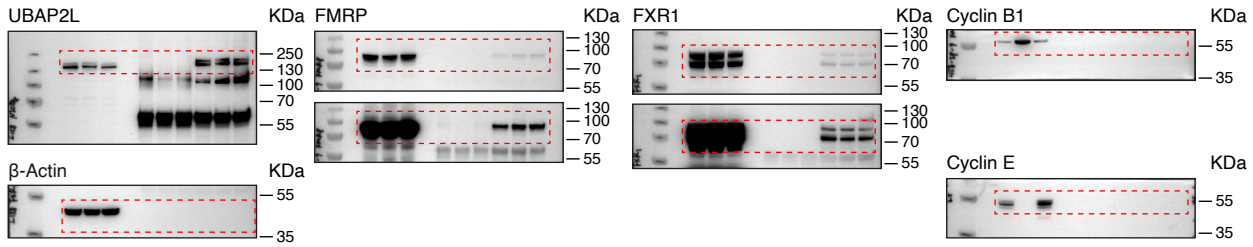

Corresponding to Fig. S5L

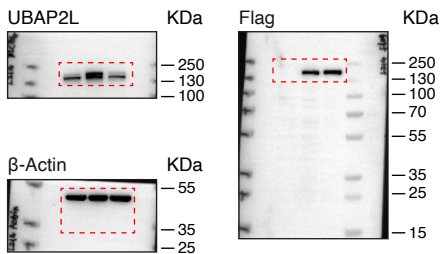

Corresponding to Fig. S5O

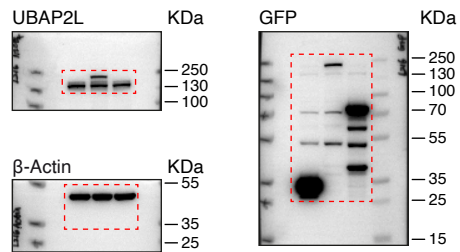

Corresponding to Fig. S5Q

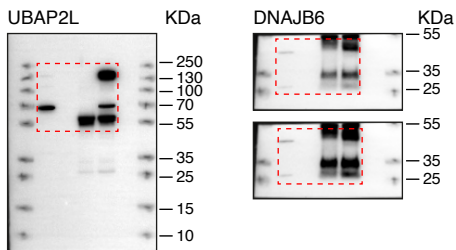

Supplement: JCB_202310006_SourceDataFS5.pdf [file JCB_202310006_SourceDataFS5.pdf]
